# Supplementary material for: New β-diketone-boron difluoride based near-infrared fluorescent probes for polarity detection
Source: Royal Society of Chemistry journal article supplement (doi:10.1039/d1an00912e), 2021-01-01
Supplement: d1an00912e1.pdf [file d1an00912e1.pdf]

*Supporting Information*

**New  $\beta$ -diketone-boron difluoride based near-infrared  
fluorescent probes for polarity detection**

Qingqing Ma, Yunxiao Zhang, Yawen Jiao, Tian Zhang, Qiangyan Chu, Haibin

Xiao,\* Ziyan Zhou and Yuying Liu\*

*School of Chemistry and Chemical Engineering, Shandong University of*

*Technology, Zibo 255049, P. R. China*

E-mail: haibinxiao@sdut.edu.cn; lyy999999@163.com.

## Contents

|                    |     |
|--------------------|-----|
| Experimental ..... | S3  |
| Scheme S1 .....    | S3  |
| Figure S1 .....    | S6  |
| Table S1 .....     | S7  |
| Table S2 .....     | S7  |
| Table S3 .....     | S8  |
| Figure S2 .....    | S9  |
| Figure S3 .....    | S9  |
| Figure S4 .....    | S10 |
| Figure S5 .....    | S10 |
| Figure S6 .....    | S11 |
| Figure S7 .....    | S12 |
| Figure S8 .....    | S13 |
| Figure S9 .....    | S13 |
| Figure S10 .....   | S14 |
| Figure S11 .....   | S15 |
| Figure S12 .....   | S16 |
| Figure S13 .....   | S17 |
| Figure S14 .....   | S18 |
| Figure S15 .....   | S19 |
| Figure S16 .....   | S20 |
| Figure S17 .....   | S21 |
| Reference .....    | S21 |

## Experimental

### Materials and instruments

All reagents for synthesis and test were purchased from commercial sources and used without further purification. The experimental water was deionized water and the inorganic salts used were analytical grade. The fluorescence and absorption spectra were recorded with F-380A fluorescence spectrometer and the UV-2450 spectrophotometer.  $^1\text{H}$  NMR and  $^{13}\text{C}$  NMR spectra were collected on Bruker Avance III 400 NMR spectrometer.

### Synthesis

The facile synthetic procedures of probes **1** and **2** are outlined in the Scheme S1. The dimethyldiketone boron complex (compound **a**) was obtained according to a previous literature.<sup>1</sup>

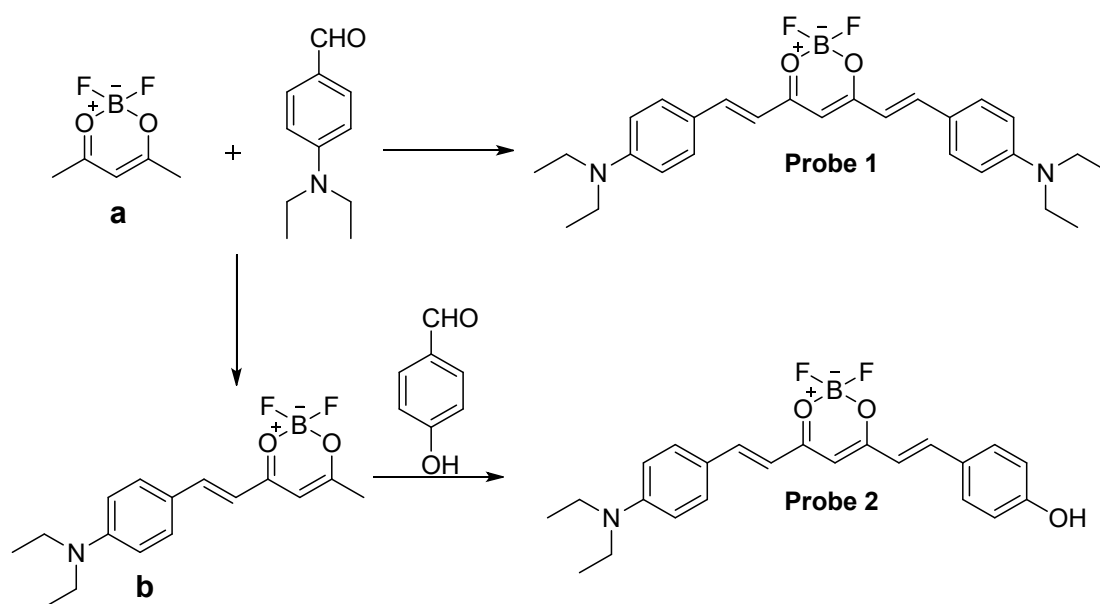

**Scheme S1** The synthetic procedures of probes **1** and **2**.

#### Synthesis of probe 1

Compound **a** (0.74 g, 5.0 mmol) and 4-diethylaminobenzaldehyde (1.77 g, 10 mmol) were dissolved in 20 mL ethyl acetate at 0 °C, then *n*-butylamine was added. The mixture was stirred for 24 h and quenched with 20 mL water. After extracted with

ethyl acetate, the crude product was concentrated and further purified by column chromatography with dichloromethane: petroleum ether (3:2, V/V) as the eluent. Finally, probe **1** was obtained as a blue violet solid with a yield of 58 %. <sup>1</sup>H NMR (400 MHz, CDCl<sub>3</sub>)  $\delta$  (ppm): 1.13 (t,  $J$  = 8.0 Hz, 12H), 3.34 (q,  $J$  = 8.0 Hz, 8H), 5.78 (s, 1H), 6.31 (d,  $J$  = 16.0 Hz, 2H), 6.55 (d,  $J$  = 8.0 Hz, 4H), 7.37 (d,  $J$  = 8.0 Hz, 4H), 7.81 (d,  $J$  = 16.0 Hz, 2H). <sup>13</sup>C NMR (100 MHz, CDCl<sub>3</sub>)  $\delta$  (ppm): 11.6, 43.6, 99.8, 110.4, 113.3, 120.7, 130.7, 145.5, 149.4, 176.4. HRMS  $m/z$  calcd. for C<sub>27</sub>H<sub>33</sub>BF<sub>2</sub>N<sub>2</sub>O<sub>2</sub> [M<sup>+</sup>H<sup>+</sup>]: 467.2680, found 467.2617.

## Synthesis of probe 2

### *Synthesis of compound b*

Compound **a** (0.74 g, 5.0 mmol) and 4-diethylaminobenzaldehyde (0.89 g, 5.0 mmol) were dissolved in 15 mL ethyl acetate at 0 °C, then n-butylamine was added. The mixture was stirred for 10 h and quenched with 15 mL water. After extracted with ethyl acetate, the crude product was concentrated and further purified by column chromatography with dichloromethane: petroleum ether (3:2, V/V) as the eluent. Finally, compound **b** was obtained as a brick-red solid with a yield of 61 %. <sup>1</sup>H NMR (400 MHz, DMSO-*d*<sub>6</sub>)  $\delta$  (ppm): 1.17 (t,  $J$  = 8.0 Hz, 6H), 2.30 (s, 3H), 3.50 (q,  $J$  = 8.0 Hz, 4H), 6.32 (s, 1H), 6.73 (d,  $J$  = 16.0 Hz, 1H), 6.80 (d,  $J$  = 8.0 Hz, 2H), 7.72 (d,  $J$  = 8.0 Hz, 2H), 8.02 (d,  $J$  = 16.0 Hz, 1H). <sup>13</sup>C NMR (100 MHz, DMSO-*d*<sub>6</sub>)  $\delta$  (ppm): 12.9, 23.9, 44.6, 100.3, 112.1, 112.7, 121.2, 133.5, 150.3, 151.7, 180.5, 186.5.

### *Synthesis of probe 2*

Compound **b** (0.60 g, 2.0 mmol) and 4-hydroxybenzaldehyde (0.31 g, 2.5 mmol) were dissolved in 15 mL acetonitrile at 25 °C, then n-butylamine was added. The mixture was stirred for 20 h and concentrated. The crude product was further purified by column chromatography with dichloromethane: petroleum ether (3:2, V/V) as the eluent. Probe **2** as a blue violet solid was obtained with a yield of 46 %. <sup>1</sup>H NMR (400 MHz, DMSO-*d*<sub>6</sub>)  $\delta$  (ppm): 1.20 (t,  $J$  = 8.0 Hz, 6H), 3.52 (q,  $J$  = 8.0 Hz, 4H), 6.40 (s, 1H), 6.82 (d,  $J$  = 8.0 Hz, 2H), 6.87 (d,  $J$  = 16.0 Hz, 1H), 6.91 (d,  $J$  = 8.0 Hz, 2H), 6.97 (d,  $J$  = 16.0 Hz, 1H), 7.74 (d,  $J$  = 8.0 Hz, 4H), 7.86 (d,  $J$  = 16.0 Hz, 1H), 7.95 (d,  $J$  = 16.0 Hz, 1H), 10.42 (s, 1H). <sup>13</sup>C NMR (100 MHz, DMSO-*d*<sub>6</sub>)  $\delta$  (ppm): 13.0, 44.6,

101.4, 112.1, 113.9, 116.6, 118.5, 121.5, 126.1, 132.0, 133.3, 144.7, 148.5, 151.5, 161.5, 176.4, 179.0. HRMS  $m/z$  calcd. for  $C_{23}H_{24}BF_2NO_3$   $[M^+H^+]$ : 412.1894, found 412.1847.

### **Spectral measurement**

The initial solution of probes **1** or **2** was dissolved in corresponding solvents. For the selectivity experiments, interfering substances were prepared in deionized water. For the spectra measurement, the stock solution was dissolved to 10  $\mu$ M in different solvents. Subsequently, the solution was detected in a fluorescence spectrophotometer. The excitation and emission slits were set at 5.0 nm and 5.0 nm, respectively. The excitation wavelength was 590 nm or 550 nm for probes **1** and **2**, respectively.

### **Cell culture and imaging**

Hepal-6 cells were cultured in Dulbecco's modified Eagle's medium (DMEM, Invitrogen) supplemented with 10 % fetal bovine serum (Invitrogen), 1.0 % penicillin and 1.0 % streptomycin. The cells were seeded in confocal culture dishes and then incubated for 24 h at 37 °C under a humidified atmosphere containing 5.0 %  $CO_2$ . For colocalization cell imaging experiments, the cells were seeded onto glass plates for 24 h for adherence, then washed by PBS and incubated with the probe **1** and Nile Red (the commercial dye for lipid droplets) before fluorescence imaging. To test the cytotoxicity of **1**, the cell viability of cells was determined by MTT assay.

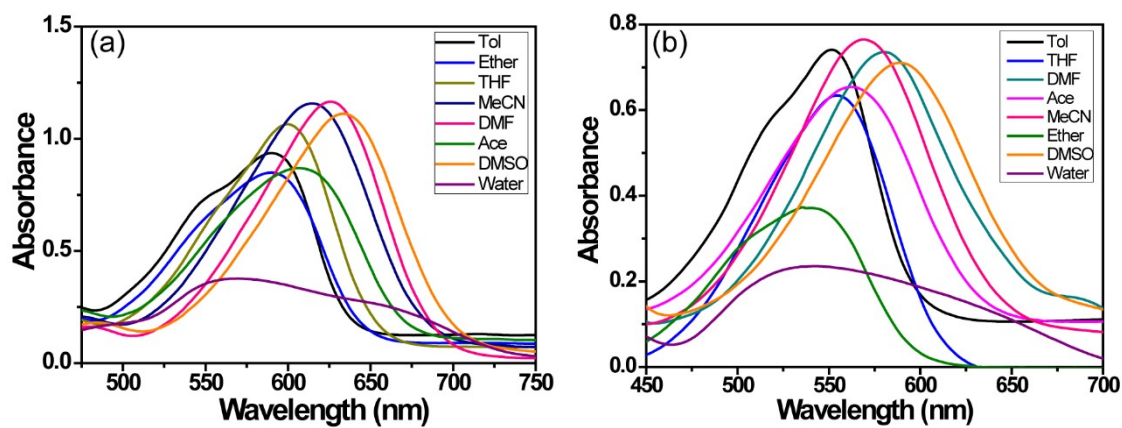

**Figure S1** (a) The absorption spectra of probe **1** (10  $\mu$ M) in common solvents with different polarities. (b) The absorption spectra of probe **2** (10  $\mu$ M) in common solvents with different polarities.

**Table S1** The photophysical properties of probe **1** in different solvents.

| Solvent | polarity | $\lambda_{\text{abs}}^{\text{a}}$ | $\lambda_{\text{em}}^{\text{b}}$ | Stokes shift (nm) | $\epsilon^{\text{c}}$ ( $\times 10^4$ ) | $\Phi^{\text{d}}$ |
|---------|----------|-----------------------------------|----------------------------------|-------------------|-----------------------------------------|-------------------|
| Tol     | 2.4      | 590                               | 640                              | 50                | 9.4                                     | 0.345             |
| Ether   | 2.9      | 592                               | 643                              | 51                | 8.5                                     | 0.335             |
| THF     | 4.2      | 600                               | 652                              | 52                | 10.7                                    | 0.290             |
| Ace     | 5.4      | 606                               | 680                              | 74                | 8.7                                     | 0.062             |
| MeCN    | 6.2      | 614                               | 709                              | 95                | 11.6                                    | 0.060             |
| DMF     | 6.4      | 619                               | 716                              | 97                | 11.7                                    | 0.050             |
| DMSO    | 7.2      | 623                               | 721                              | 98                | 11.1                                    | 0.032             |
| Water   | 10.2     | 569                               | 735                              | 166               | 3.8                                     | < 0.01            |

a: Maximum absorption wavelength (nm);

b: Maximum emission wavelength (nm);

c: molar absorption coefficient ( $\text{L} \cdot \text{mol}^{-1} \cdot \text{cm}^{-1}$ );

d: fluorescence quantum yield.

**Table S2** The photophysical properties of probe **2** in different solvents.

| Solvent | polarity | $\lambda_{\text{abs}}^{\text{a}}$ | $\lambda_{\text{em}}^{\text{b}}$ | Stokes Shift (nm) | $\epsilon^{\text{c}}$ ( $\times 10^4$ ) | $\Phi^{\text{d}}$ |
|---------|----------|-----------------------------------|----------------------------------|-------------------|-----------------------------------------|-------------------|
| Tol     | 2.4      | 544                               | 631                              | 87                | 7.4                                     | 0.339             |
| Ether   | 2.9      | 536                               | 643                              | 107               | 3.7                                     | 0.166             |
| THF     | 4.2      | 555                               | 666                              | 111               | 6.3                                     | 0.060             |
| Ace     | 5.4      | 562                               | 693                              | 131               | 6.5                                     | 0.016             |
| MeCN    | 6.2      | 569                               | 704                              | 135               | 7.7                                     | 0.014             |
| DMF     | 6.4      | 580                               | 717                              | 137               | 7.4                                     | 0.011             |
| DMSO    | 7.2      | 588                               | 731                              | 143               | 7.1                                     | 0.020             |
| Water   | 10.2     | 541                               | --- <sup>e</sup>                 | --- <sup>e</sup>  | 2.3                                     | < 0.01            |

a: Maximum absorption wavelength (nm);

b: Maximum emission wavelength (nm);

c: molar absorption coefficient ( $\text{L} \cdot \text{mol}^{-1} \cdot \text{cm}^{-1}$ );

d: fluorescence quantum yield;

e: Not detected.

**Table S3** Performances of some representative polarity-sensitive probes

| Probes          | NIR <sup>a</sup> | $\varepsilon_{\max}^b$<br>( $\times 10^4$ ) | Stokes shift <sup>c</sup> | Application                       | Ref.      |
|-----------------|------------------|---------------------------------------------|---------------------------|-----------------------------------|-----------|
| <b>1</b>        | Yes              | 11.7                                        | 166                       | HEPA1-6 cells                     | This work |
| <b>2</b>        | Yes              | 7.7                                         | 143                       | HEPA1-6 cells                     | This work |
| <b>CTPE</b>     | NO               | -- <sup>d</sup>                             | 97                        | HeLa cells and tumor-bearing mice | 2         |
| <b>NCT</b>      | NO               | 3.02                                        | 130                       | tumor bearing mouse               | 3         |
| <b>Lyso-OSC</b> | NO               | -- <sup>d</sup>                             | 155                       | MCF-7 cells                       | 4         |
| <b>Lyso-NA</b>  | NO               | -- <sup>d</sup>                             | 154                       | MCF-7 cells                       | 5         |
| <b>PX-P</b>     | NO               | 5.16                                        | 169                       | HL-7702 cells and NAFLD mice      | 6         |
| <b>PEG-NBD</b>  | NO               | -- <sup>d</sup>                             | 57                        | mouse mammary tumor and zebrafish | 7         |

a: The near-infrared fluorescence emission;

b: The maximum molar absorption coefficient ( $\text{L} \cdot \text{mol}^{-1} \cdot \text{cm}^{-1}$ );

c: The maximum Stokes shift (nm);

d: Not mentioned.



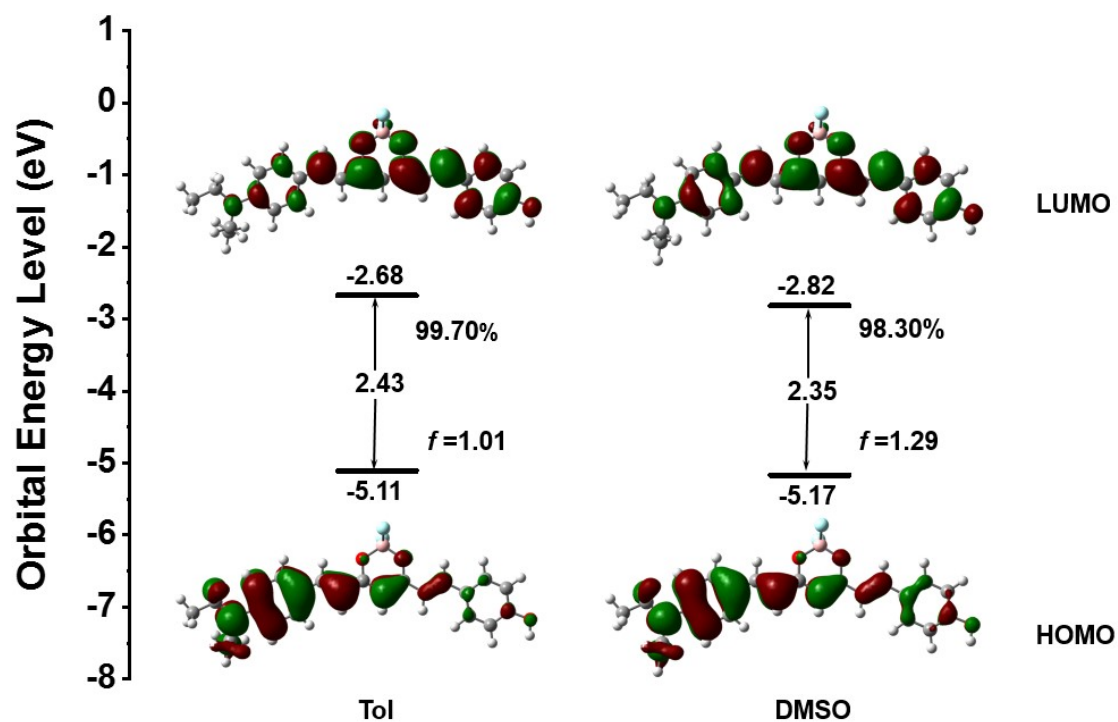

**Figure S2** Calculated orbital energy levels and electron density contours of HOMOs and LUMOs for probe **2** in Tol and DMSO, respectively. Transition components and oscillator strengths are also given.

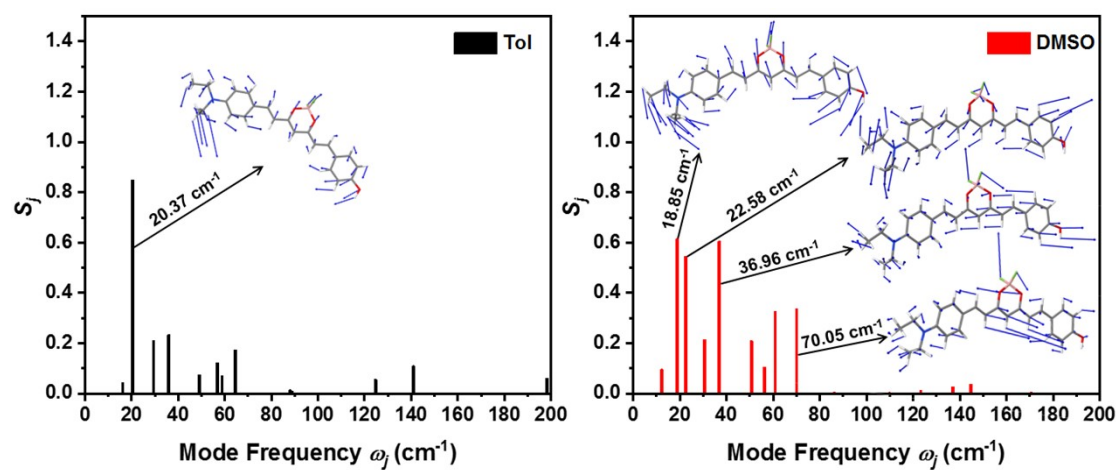

**Figure S3** Calculated Huang-Rhys factor  $S_j$  versus mode frequency  $\omega_j$  for probe **2** in Tol and DMSO.

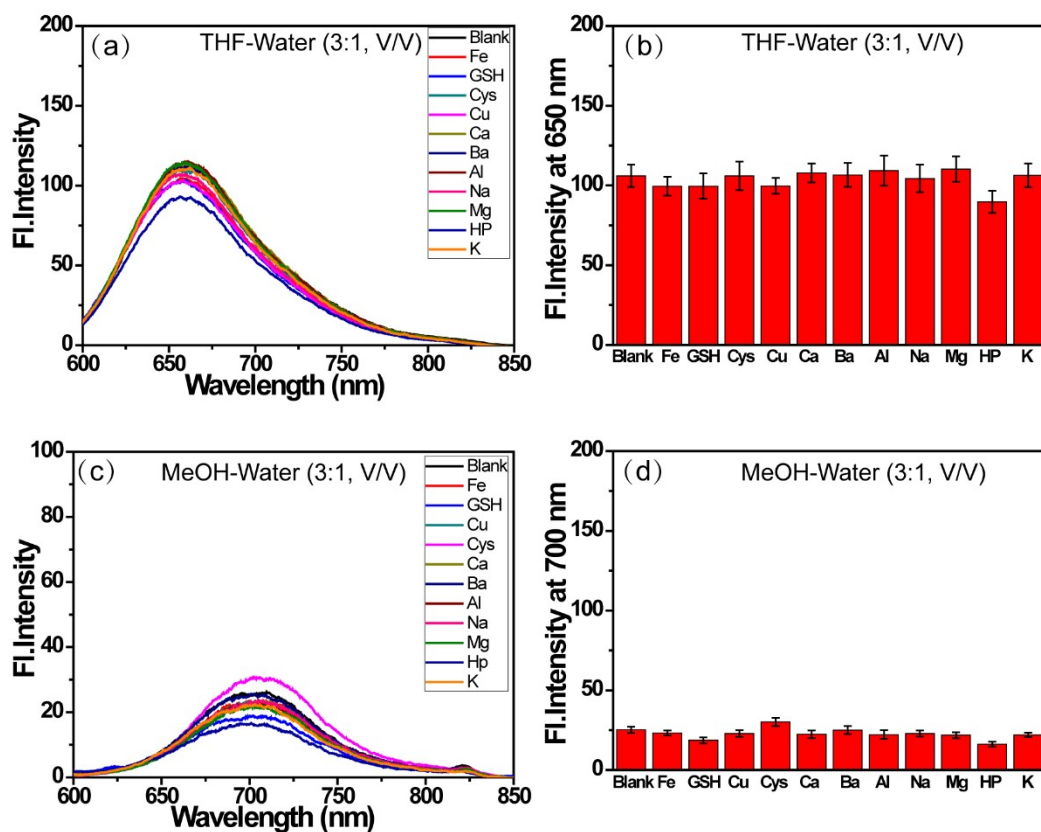

**Figure S4** (a) The fluorescence spectra of probe **2** (10  $\mu\text{M}$ ) with or without various species in THF-water (25 % water). (b) The fluorescence intensity at 650 nm of probe **2** (10  $\mu\text{M}$ ) with or without various species. (c) The fluorescence spectra of probe **2** (10  $\mu\text{M}$ ) with or without various species in MeOH-water (25 % water). (d) The fluorescence intensity at 700 nm of probe **2** (10  $\mu\text{M}$ ) with or without various species.

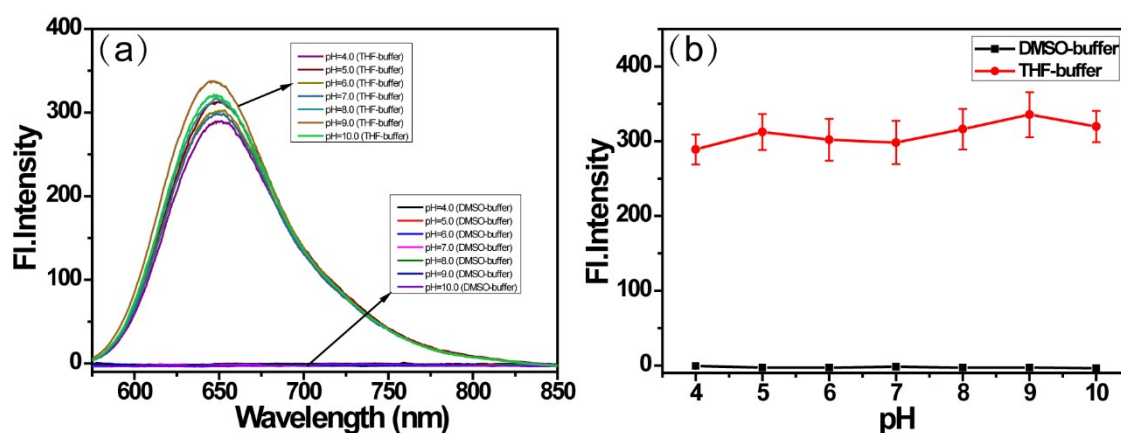

**Figure S5** (a) The fluorescence spectra of probe **2** (10  $\mu\text{M}$ ) in THF-buffer and DMSO-buffer under different pH values. (b) The fluorescence intensity change of the

maximum emission wavelength of probe **2** (10  $\mu$ M) under different pH values.

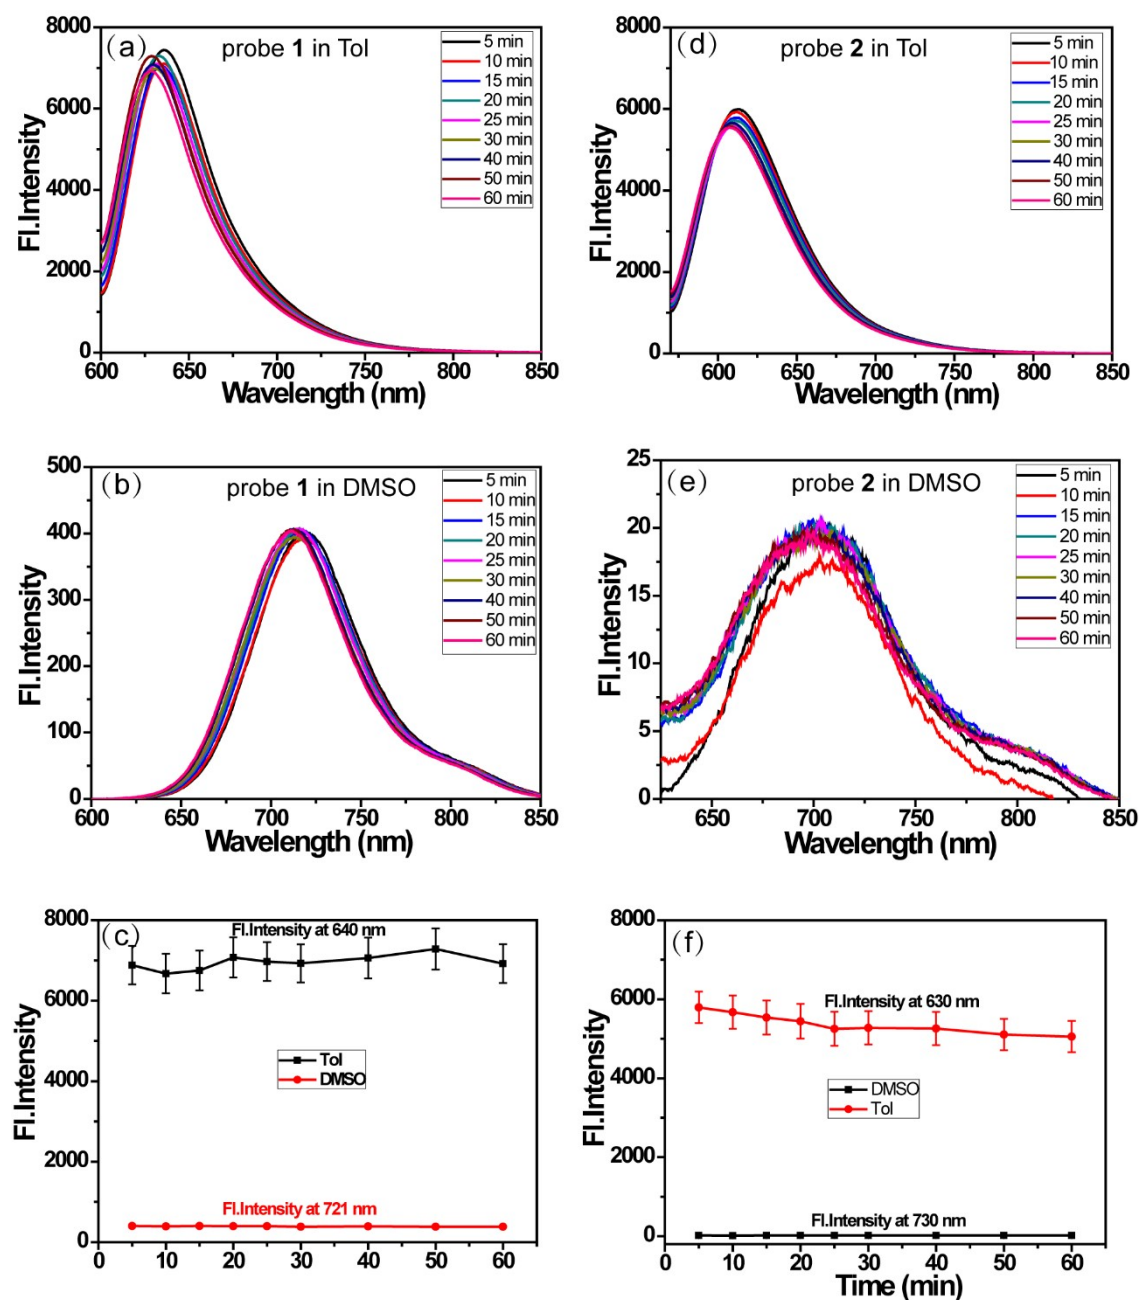

**Figure S6** (a-b) The fluorescence spectra of probe **1** (10  $\mu$ M) in different polar solvents (DMSO and Tol) with time. (c) The fluorescence intensity change of the maximum emission wavelength of probe **1** in DMSO and Tol over time. (d-e) The fluorescence spectra of probe **2** (10  $\mu$ M) in different polar solvents (DMSO and Tol) with time. (f) The fluorescence intensity change of the maximum emission wavelength of probe **2** in DMSO and Tol over time.

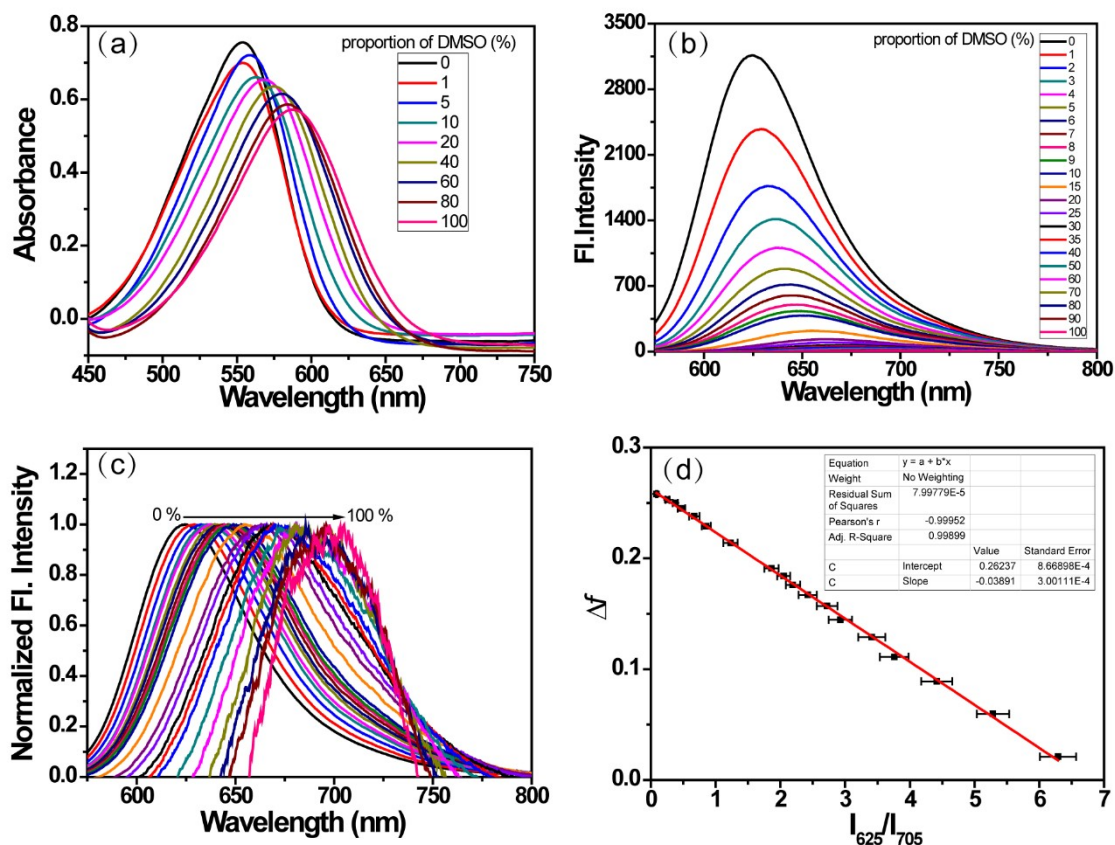

**Figure S7** (a) The absorption spectra of probe **2** in Dio-DMSO system varying with DMSO ratio. (b) The fluorescence spectra of probe **2** in Dio-DMSO system varying with DMSO ratio. (c) The normalized fluorescence spectra of probe **2** in Dio-DMSO system varying with DMSO ratio. (d) The linear relationship between the mixed solvent  $\Delta f$  value and the  $I_{625}/I_{705}$  of probe **2** (10  $\mu$ M) in the Dio-DMSO system.

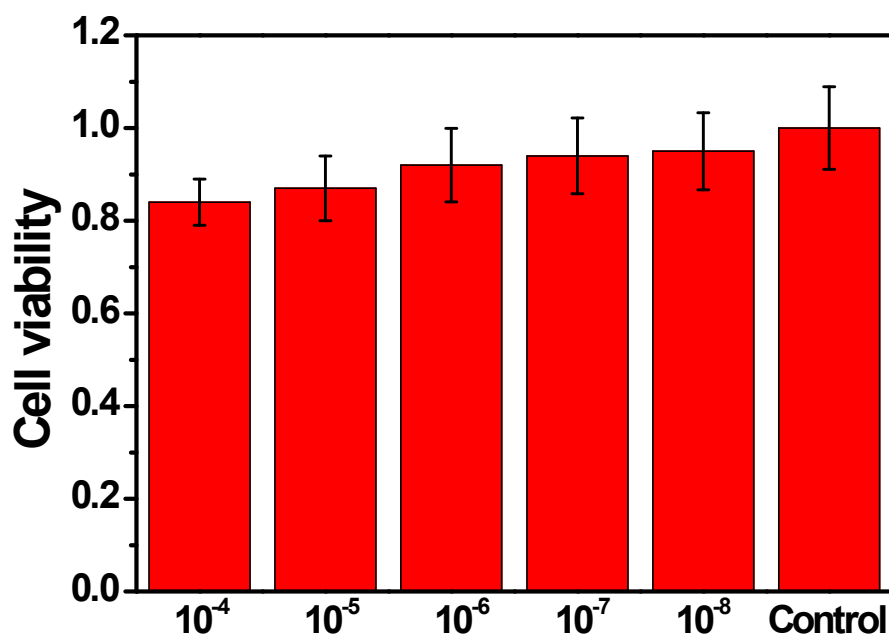

**Figure S8** The cell viability of Hepa1-6 cells incubated with different concentrations of probe **1**. The cells were seeded at about  $6 \times 10^4$  cells/well on a 96-well plate. The cells were treated with media containing **1** ( $10^{-4}$ - $10^{-8}$  M) for 10 h, and MTT assay was then performed. The half maximal inhibitory concentration was calculated to be 165  $\mu$ M.

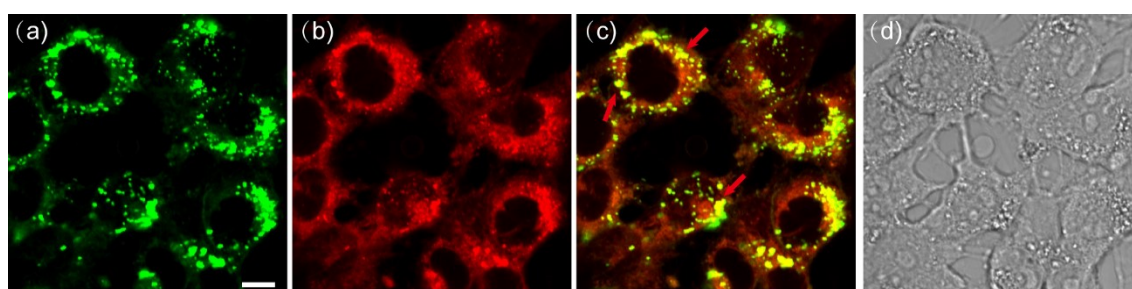

**Figure S9** Co-localization imaging experiments of Hepa1-6 cells stained with probe **1** and Nile Red. (a) Fluorescence image of Nile Red (5.0  $\mu$ M, green channel, Ex=543 nm, collected 550-590 nm). (b) Fluorescence image of **1** (10  $\mu$ M, red channel, Ex=543 nm, collected 670-750 nm). (c) Overlay of (a) and (b). (d) The bright-field image. The red arrows display the ideal overlay of probe **1** and Nile Red. Scale bar:

10  $\mu\text{m}$ .

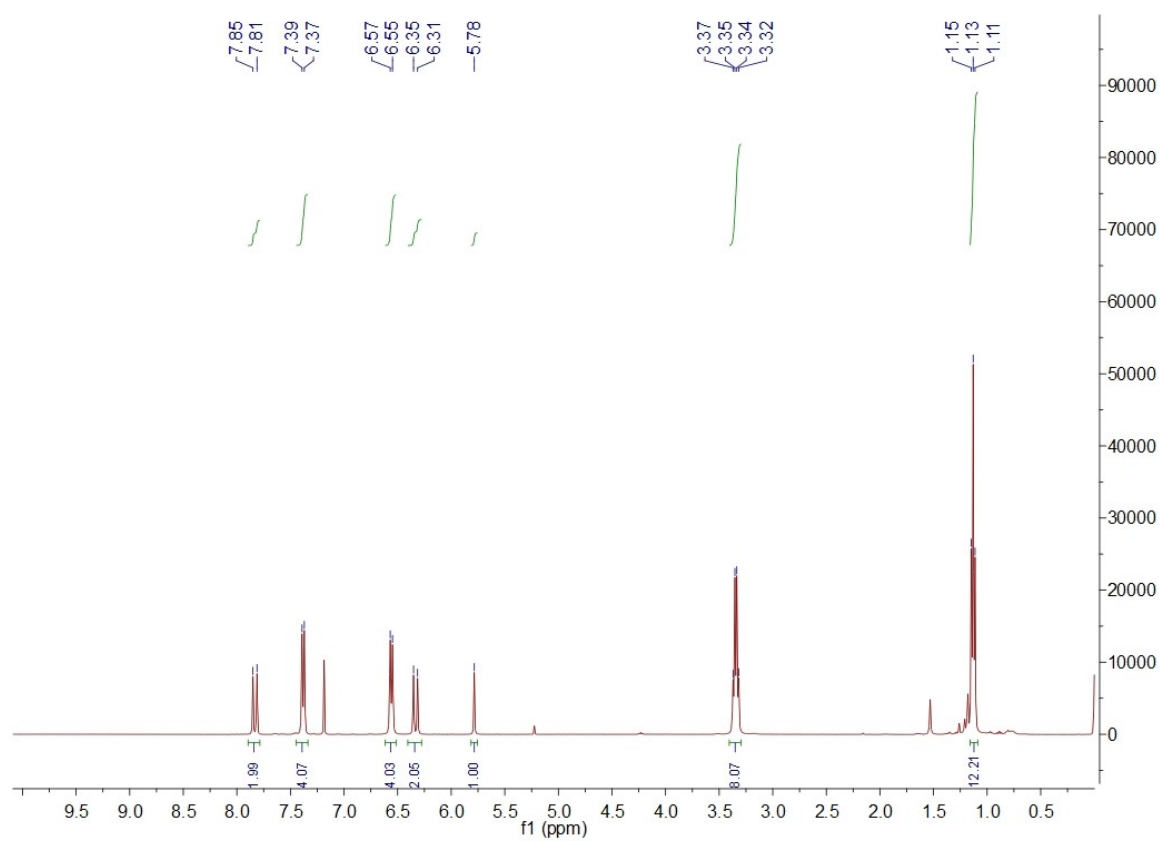

**Figure S10** The  $^1\text{H}$  NMR of probe **1**.

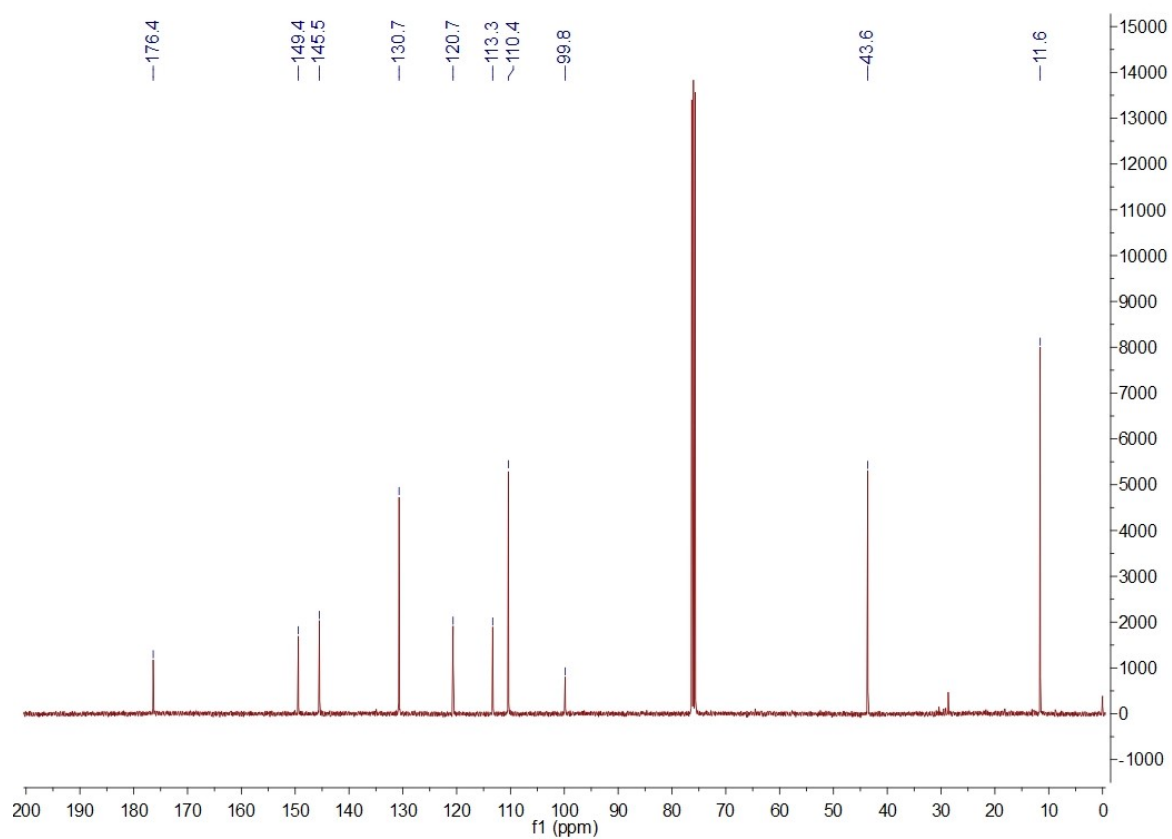

**Figure S11** The  $^{13}\text{C}$  NMR of probe 1.



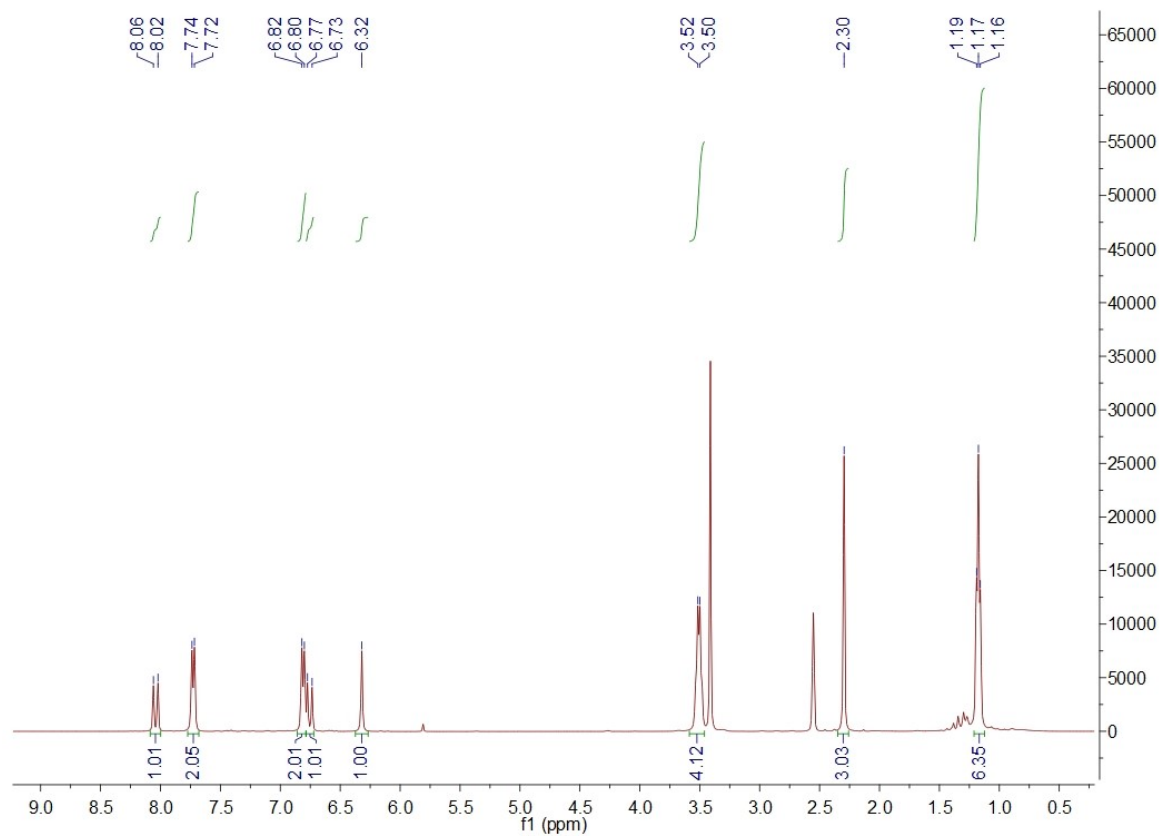

**Figure S12** The  $^1\text{H}$  NMR of Compound **b**.



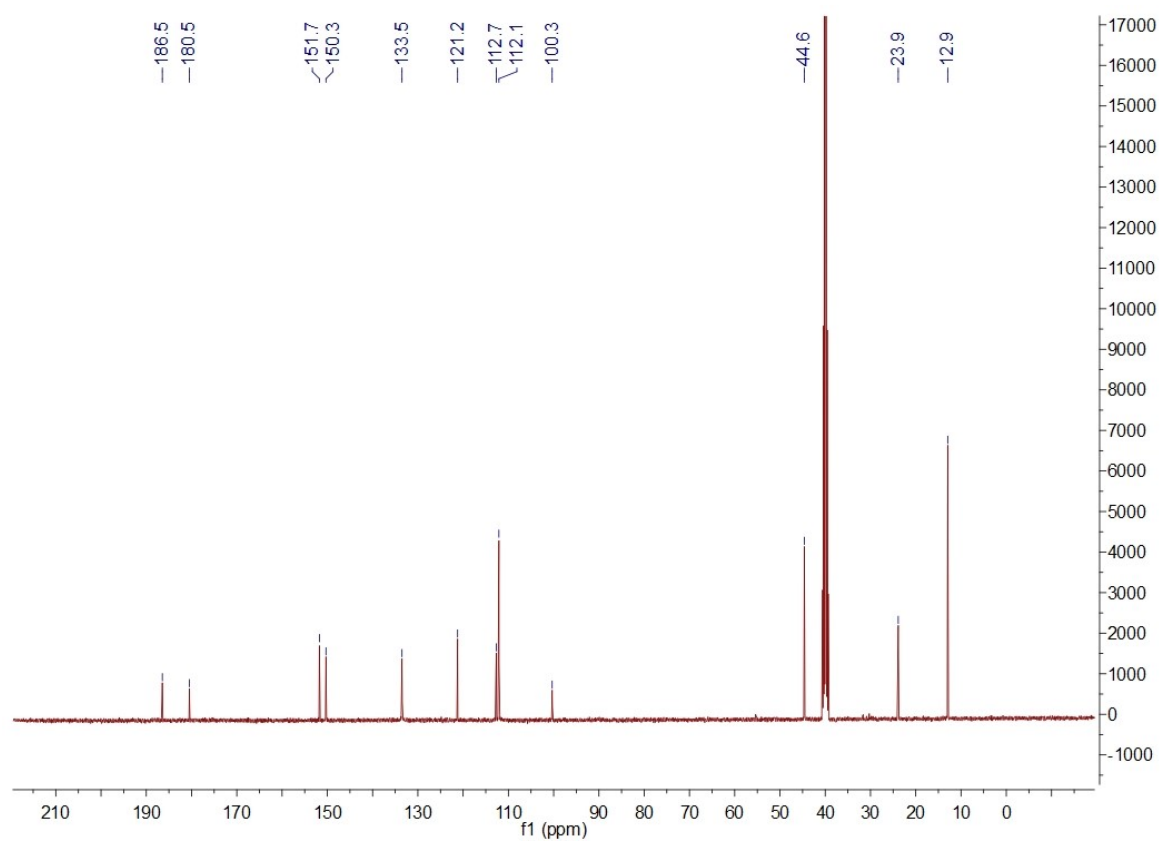

**Figure S13** The  $^{13}\text{C}$  NMR of Compound **b**.

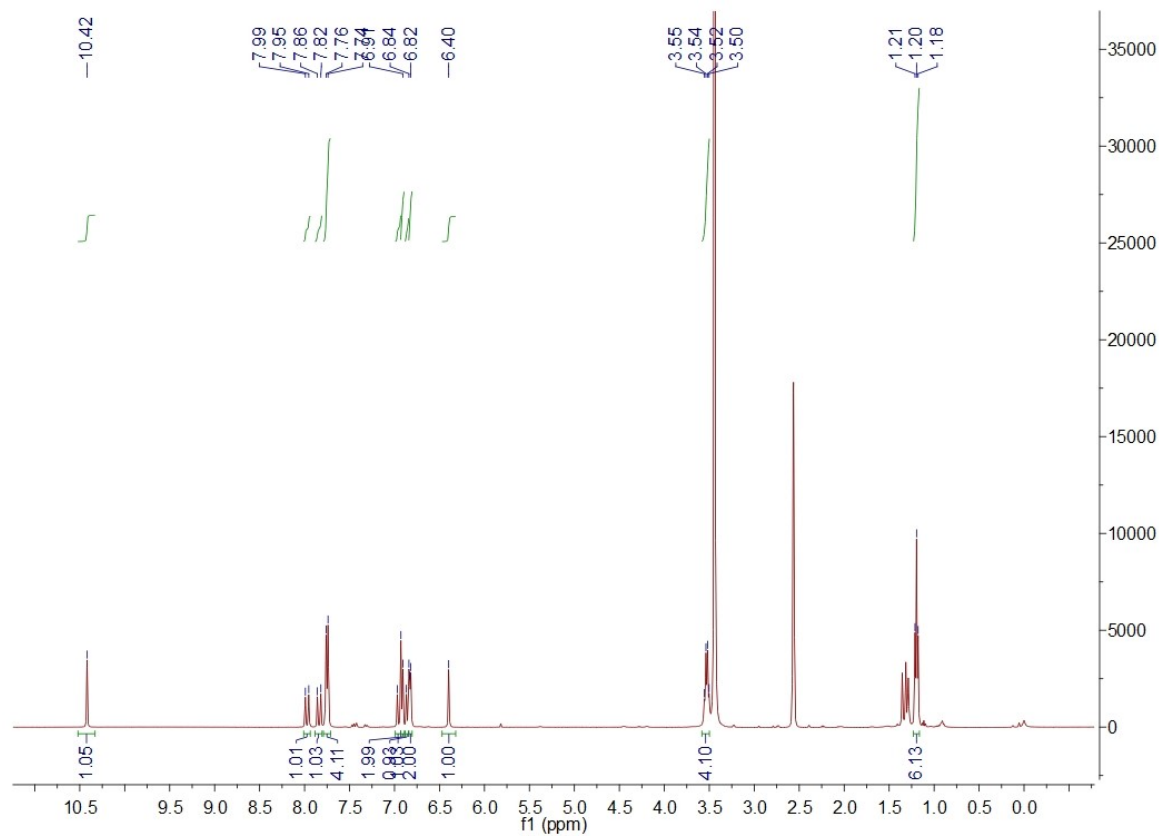

**Figure S14** The  $^1\text{H}$  NMR of probe **2**.

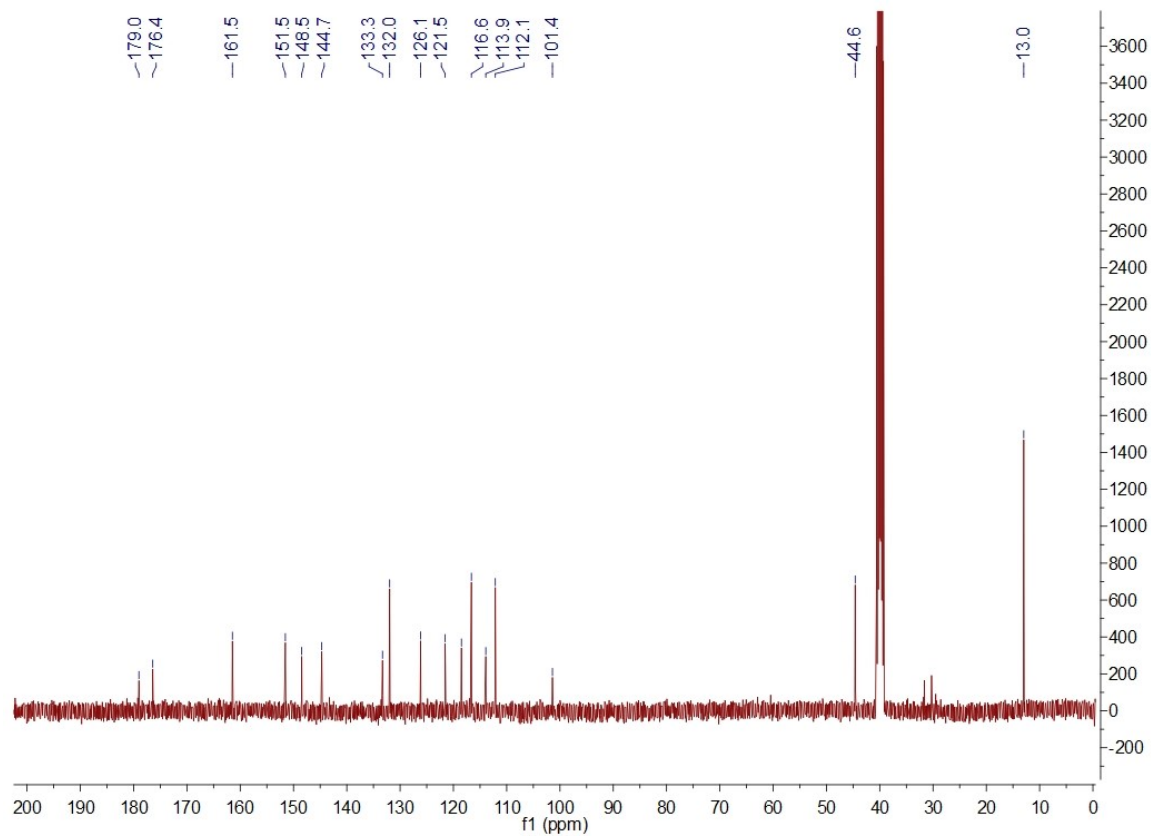

**Figure S15** The  $^{13}\text{C}$  NMR of probe 2.

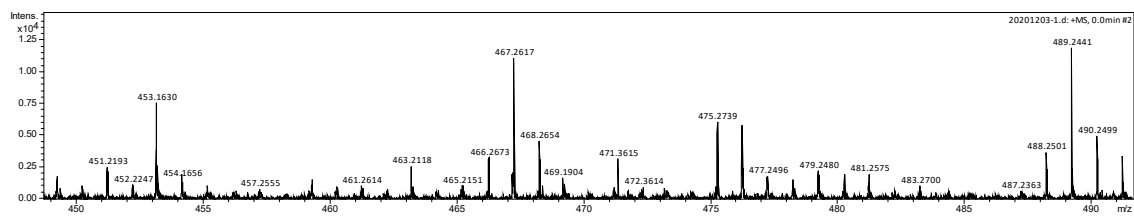

**Figure S16** The HRMS of probe 1.

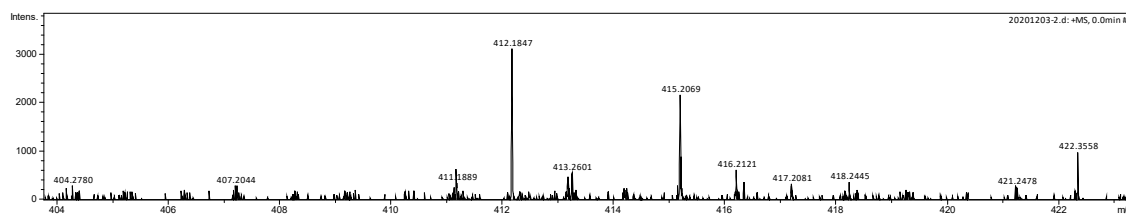

**Figure S17** The HRMS of probe **2**.

## Reference

- 1 K. K. Laalia, B. M. Rathmana, S. D. Bungeb, X. Qic and G. L. Borosky, *J. Fluorine Chem.*, 2016, **191**, 29-41.
- 2 C. Liu, J. Yin, B. Lu and W. Lin, *New J. Chem.*, 2021, **45**, 4347-4353.
- 3 M. Qian, L. Zhang, Z. Pu, C. Zhang, Q. Chen, X. Sui, X. Han, S. Zeng, H. Cui, J. Wang and X. Peng, *Sensor. Actuat. B-Chem.*, 2021, **344**, 130261.
- 4 C. Jiang, L. Li, J. Jiang, L. Hou, G. Fang, H. Yu and X. Meng, *Chinese Chem. Lett.*, 2020, **31**, 447-450.
- 5 Z. Yuan, J. Chen, Q. Zhou, A. Liu, Z. Qiang, M. Fang, M. Chen, Y. Feng, H. Yu, X. Yang and X. Meng, *Chinese Chem. Lett.*, 2021, **32**, 1803-1808.
- 6 Y. Zhou, C. Wu, X. Wang, P. Li, N. Fan, W. Zhang, Z. Liu, W. Zhang and B. Tang, *Anal. Chem.*, 2021, **93**, 9609-9620.
- 7 F. Yu, X. Jing and W. Lin, *Sensor. Actuat. B-Chem.*, 2020, **302**, 127207.
